# Supplementary material for: Dutch ICU survivors have more consultations with general practitioners before and after ICU admission compared to a matched control group from the general population
Source: PubMed Central journal article supplement (PMC6532903; doi:10.1371/journal.pone.0217225), 2019-05-23
Supplement: pone.0217225.s001.pdf [file pone.0217225.s001.pdf]

**S1 Table.** Number of participants, number of GP consultations, follow-up time and crude Risk Ratio of GP consultations among ICU patients compared to the control group for the different time periods

| Period                                    | Control group (n) | GP consultations (n) | Follow-up time (weeks) | ICU population (n) | GP consultations (n) | Follow-up time (weeks) | Risk Ratio (95% CI) |
|-------------------------------------------|-------------------|----------------------|------------------------|--------------------|----------------------|------------------------|---------------------|
| During the year before hospital admission | 56,267            | 326,893              | 2,916,176              | 56,267             | 597,307              | 2,925,884              | 1.82 (1.80; 1.85)   |
| 1 (week 52-17)                            | 56,267            | 225,086              | 2,022,398              | 56,267             | 349,410              | 2,025,612              | 1.55 (1.53; 1.57)   |
| 2 (week 16-5)                             | 55,989            | 76,017               | 670,772                | 56,267             | 155,020              | 675,204                | 2.03 (1.98; 2.08)   |
| 3 (week 4-1)                              | 55,774            | 25,790               | 223,006                | 56,267             | 92,877               | 225,068                | 3.58 (3.37; 3.80)   |
| During the year after hospital discharge  | 55,719            | 326,380              | 2,868,684              | 56,267             | 707,305              | 2,733,090              | 2.28 (2.24; 2.31)   |
| 4 (week 1-4)                              | 55,719            | 24,890               | 222,726                | 56,267             | 123,441              | 222,414                | 4.98 (4.74; 5.23)   |
| 5 (week 5-16)                             | 55,617            | 75,081               | 665,947                | 54,872             | 178,058              | 648,892                | 2.43 (2.38; 2.49)   |
| 6 (week 17-52)                            | 55,340            | 226,409              | 1,980,011              | 53,282             | 405,806              | 1,861,784              | 1.91 (1.88; 1.93)   |
| Total study period                        | 56,267            | 653273               | 5,784,860              | 56,267             | 1,304,612            | 5,658,974              | 2.04 (2.02; 2.06)   |

CI: Confidence Interval; GP: General practitioner; ICU: Intensive Care Unit
